# Supplementary material for: On the Luminescence Properties and Surface Passivation Mechanism of III- and N-Polar Nanopillar Ultraviolet Multiple-Quantum-Well Light Emitting Diodes
Source: MDPI journal article supplement (doi:10.3390/mi11060572), 2020-06-05
Supplement: s1 [file s1]

## Supplementary Materials

# On the Luminescence Properties and Surface Passivation Mechanism of III- and N-Polar Nanopillar Ultraviolet Multiple-Quantum-Well Light Emitting Diodes

Moheb Sheikhi <sup>1,2,†</sup>, Yijun Dai <sup>1,2,†</sup>, Mei Cui <sup>1,2</sup>, Liang Li <sup>1,2</sup>, Jianzhe Liu <sup>3</sup>, Wenan Lan <sup>3</sup>, Rongrong Jiang <sup>1</sup>, Wei Guo <sup>1,2,\*</sup>, Kuan W.A. Chee <sup>4,5,\*</sup> and Jichun Ye <sup>1,2</sup>

<sup>1</sup> Ningbo Institute of Materials Technology and Engineering, Chinese Academy of Sciences, Ningbo 315201, China; moheb@nimte.ac.cn (M.S.); daiyijun@nimte.ac.cn (Y.D.); cuimei@nimte.ac.cn (M.C.); lliang@nimte.ac.cn (L.L.); jiangrr@nimte.ac.cn (R.J.); jichun.ye@nimte.ac.cn (J.Y.)

<sup>2</sup> University of Chinese Academy of Sciences, Beijing 100049, China

<sup>3</sup> Zhe Jiang Bright Semiconductor Technology Co., Ltd., Jinhua 321016, China; jzliu@bst-group.cn (J.L.); ben@bst-group.cn (W.L.)

<sup>4</sup> Hefei National Laboratory for Physical Sciences at Microscale, and Department of Physics, University of Science and Technology of China, Hefei 230026, China

<sup>5</sup> Laser Research Institute, Shandong Academy of Sciences, Qingdao 226100, China

\* Correspondence: guowei@nimte.ac.cn (W.G.); kuan.chee@cantab.net (K.W.A.C.)

† These authors contribute equally to this work.

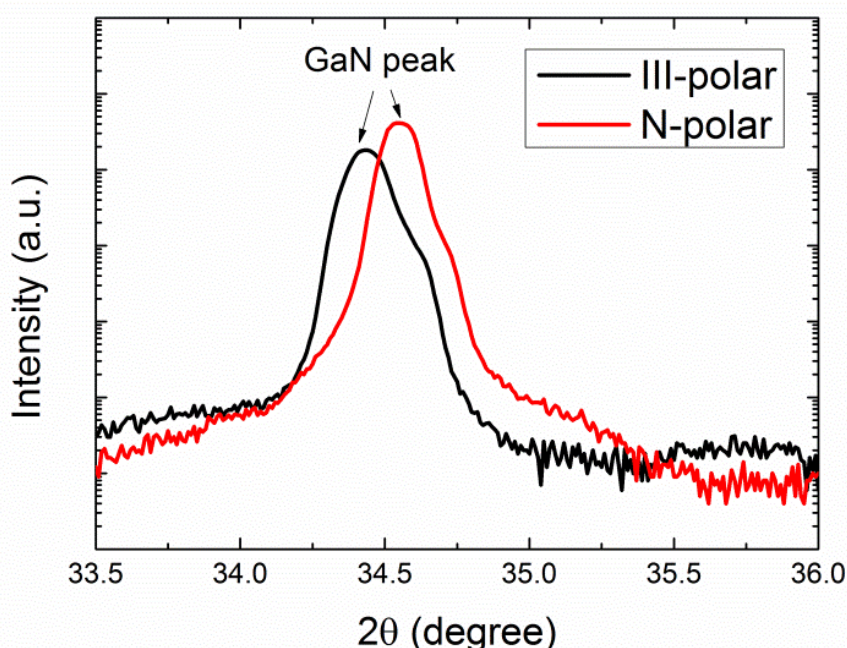

**Figure S1.** HRXRD symmetric  $\omega$ -2 $\theta$  scans of III- and N-polar MQW samples.

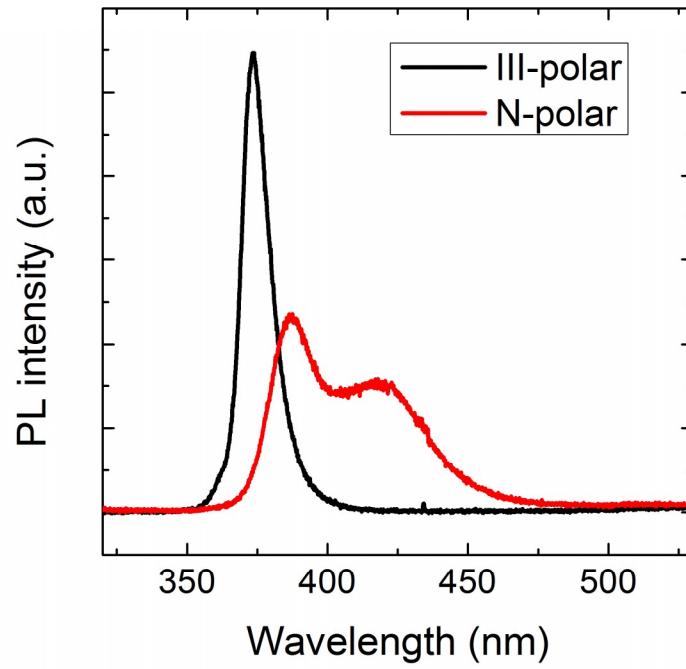

**Figure S2.** RT PL spectra of planar III-polar and N-polar MQW samples. Peak positions and shapes are almost identical to those of nanostructured samples.

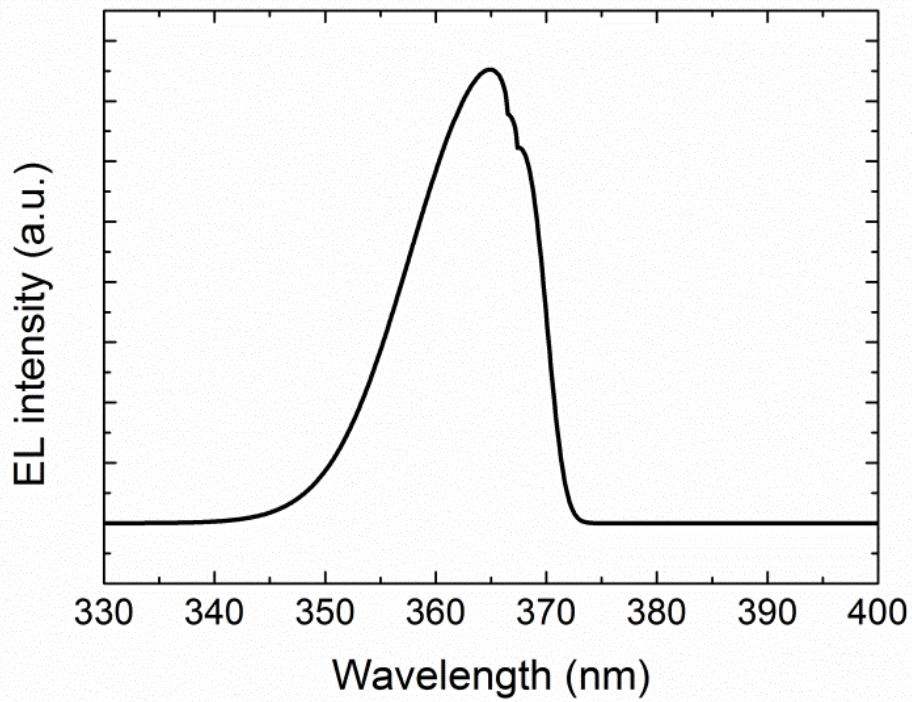

**Figure S3.** Simulated electroluminescence spectrum of UVA-LED with 3/11 nm  $\text{In}_{0.03}\text{Ga}_{0.97}\text{N}/\text{GaN}$  MQW.

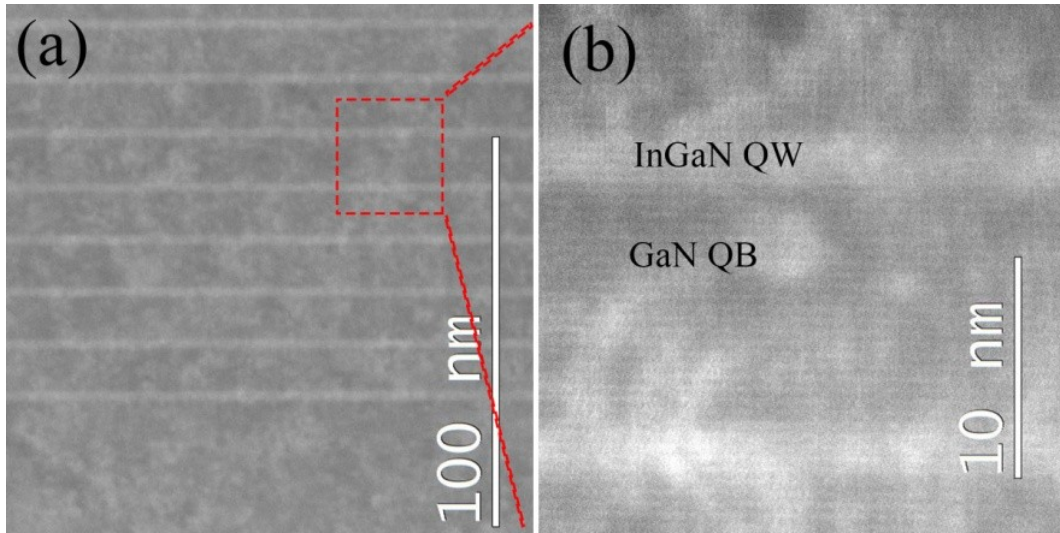

**Figure S4.** HAADF-STEM image of planar III-polar MQW samples with low magnification (a) and zoom-in view (b) of the individual QW and QB.

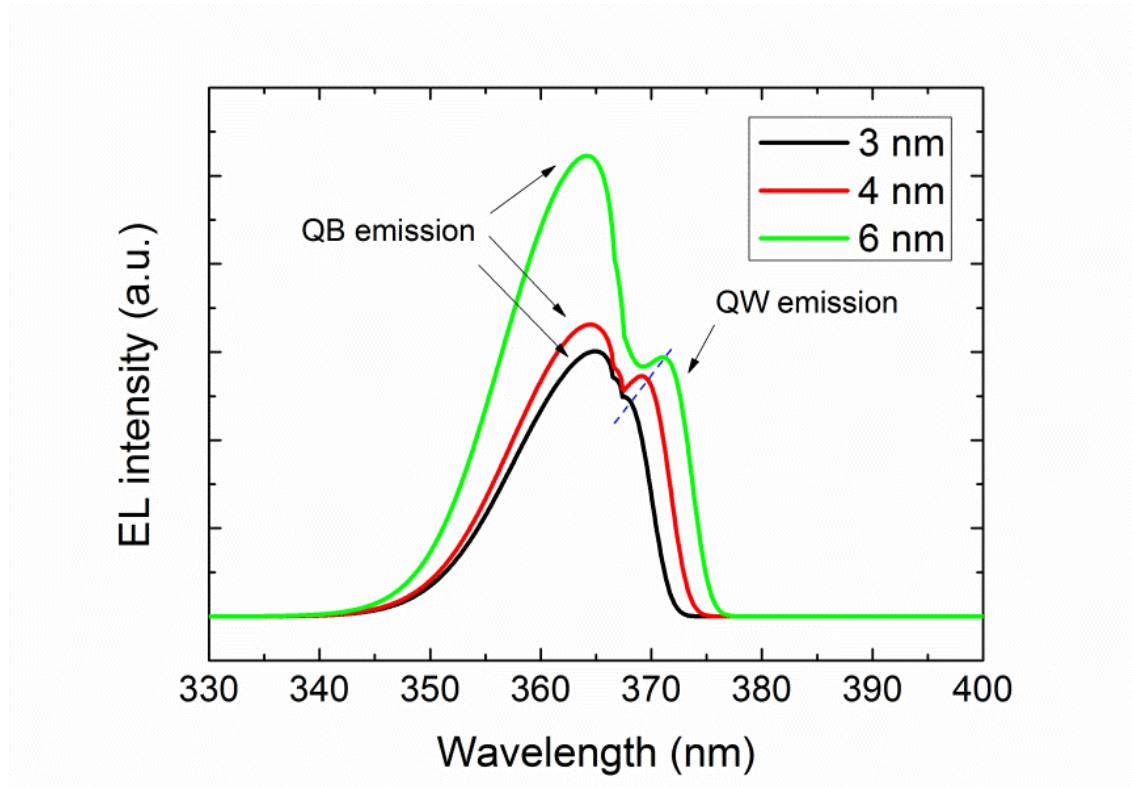

**Figure S5.** Simulated electroluminescence spectra of UVA-LED with  $\text{In}_{0.03}\text{Ga}_{0.97}\text{N}/\text{GaN}$  MQWs of varying QW thicknesses. A small red shift of less than 7 nm is observed when doubling the QW thickness.
